# Supplementary material for: Unusual Glycosaminoglycans from a Deep Sea Hydrothermal Bacterium Improve Fibrillar Collagen Structuring and Fibroblast Activities in Engineered Connective Tissues
Source: MDPI journal article supplement (doi:10.3390/md11041351), 2013-04-23
Supplement: s1 [file s1]

marinedrugs-11-01351-s001.mol
  corina  04151405313D 1   1.00000     0.00000 
CORINA 3.49 0023  12.04.2013
 55 58  0  0  0  0  0  0  0  0999 V2000
   -0.6220    1.0390    1.1396 C   0  0  0  0  0  0  0  0  0  0  0  0
   -1.3981    1.6528   -0.0297 C   0  0  0  0  0  0  0  0  0  0  0  0
   -0.7073    1.2718   -1.3427 C   0  0  0  0  0  0  0  0  0  0  0  0
   -0.6199   -0.2535   -1.4404 C   0  0  0  0  0  0  0  0  0  0  0  0
    0.0867   -0.7623   -0.3073 O   0  0  0  0  0  0  0  0  0  0  0  0
   -0.5379   -0.4773    0.9460 C   0  0  0  0  0  0  0  0  0  0  0  0
   -3.2039   -2.8071   -0.9759 C   0  0  0  0  0  0  0  0  0  0  0  0
   -1.9713   -2.2198   -1.6701 C   0  0  0  0  0  0  0  0  0  0  0  0
   -2.0480   -2.5201   -3.1693 C   0  0  0  0  0  0  0  0  0  0  0  0
   -3.2591   -1.9789   -3.7009 O   0  0  0  0  0  0  0  0  0  0  0  0
   -4.4459   -2.5259   -3.1225 C   0  0  0  0  0  0  0  0  0  0  0  0
   -4.4655   -2.2257   -1.6214 C   0  0  0  0  0  0  0  0  0  0  0  0
   -1.9377   -0.8056   -1.4676 O   0  0  0  0  0  0  0  0  0  0  0  0
   -4.4670   -3.9401   -3.3260 O   0  0  0  0  0  0  0  0  0  0  0  0
   -4.5649   -4.3286   -4.6977 C   0  0  0  0  0  0  0  0  0  0  0  0
   -3.8688   -5.6782   -4.8985 C   0  0  0  0  0  0  0  0  0  0  0  0
   -4.5959   -6.7432   -4.0718 C   0  0  0  0  0  0  0  0  0  0  0  0
   -6.0692   -6.7820   -4.4864 C   0  0  0  0  0  0  0  0  0  0  0  0
   -6.6482   -5.4883   -4.3038 O   0  0  0  0  0  0  0  0  0  0  0  0
   -6.0393   -4.4606   -5.0881 C   0  0  0  0  0  0  0  0  0  0  0  0
   -6.1676   -7.1584   -5.8614 O   0  0  0  0  0  0  0  0  0  0  0  0
   -7.4949   -7.4786   -6.2828 C   0  0  0  0  0  0  0  0  0  0  0  0
   -7.8073   -8.9355   -5.9277 C   0  0  0  0  0  0  0  0  0  0  0  0
   -9.2019   -9.2899   -6.4531 C   0  0  0  0  0  0  0  0  0  0  0  0
   -9.2498   -9.0365   -7.9621 C   0  0  0  0  0  0  0  0  0  0  0  0
   -8.9197   -7.6712   -8.2253 O   0  0  0  0  0  0  0  0  0  0  0  0
   -7.6088   -7.2952   -7.7984 C   0  0  0  0  0  0  0  0  0  0  0  0
    0.6962    1.5892    1.1791 O   0  0  0  0  0  0  0  0  0  0  0  0
   -2.7364    1.1518   -0.0307 O   0  0  0  0  0  0  0  0  0  0  0  0
   -3.6519    1.9378    0.7349 C   0  0  0  0  0  0  0  0  0  0  0  0
    0.2874   -1.0913    2.0787 C   0  0  0  0  0  0  0  0  0  0  0  0
    0.2699   -2.5155    1.9629 O   0  0  0  0  0  0  0  0  0  0  0  0
   -3.2034   -4.2286   -1.1229 O   0  0  0  0  0  0  0  0  0  0  0  0
   -5.6222   -2.8213   -1.0304 O   0  0  0  0  0  0  0  0  0  0  0  0
   -3.9997   -8.0203   -4.3078 O   0  0  0  0  0  0  0  0  0  0  0  0
   -3.9097   -6.0362   -6.2813 O   0  0  0  0  0  0  0  0  0  0  0  0
   -7.3570   -5.8288   -8.1552 C   0  0  0  0  0  0  0  0  0  0  0  0
   -7.3732   -5.6747   -9.5758 O   0  0  0  0  0  0  0  0  0  0  0  0
  -10.5644   -9.3115   -8.4500 O   0  0  0  0  0  0  0  0  0  0  0  0
   -6.8368   -9.7933   -6.5315 O   0  0  0  0  0  0  0  0  0  0  0  0
  -10.6645   -9.3244   -9.8754 C   0  0  0  0  0  0  0  0  0  0  0  0
   -1.4824    1.7911   -2.4723 N   0  0  0  0  0  0  0  0  0  0  0  0
    0.3109    1.8173   -3.7782 O   0  0  0  0  0  0  0  0  0  0  0  0
   -0.8762    2.0312   -3.6518 C   0  0  0  0  0  0  0  0  0  0  0  0
   -1.6734    2.5653   -4.8138 C   0  0  0  0  0  0  0  0  0  0  0  0
   -0.8686   -1.8945   -3.8683 C   0  0  0  0  0  0  0  0  0  0  0  0
   -1.0422   -1.0063   -4.6688 O   0  0  0  0  0  0  0  0  0  0  0  0
    0.3749   -2.3239   -3.6015 O   0  0  0  0  0  0  0  0  0  0  0  0
   -6.7446   -3.1526   -4.8374 C   0  0  0  0  0  0  0  0  0  0  0  0
   -7.5913   -3.0777   -3.9787 O   0  0  0  0  0  0  0  0  0  0  0  0
   -6.4322   -2.0709   -5.5681 O   0  0  0  0  0  0  0  0  0  0  0  0
   -9.4817  -10.7026   -6.1847 N   0  0  0  0  0  0  0  0  0  0  0  0
  -11.6708  -10.3428   -6.2051 O   0  0  0  0  0  0  0  0  0  0  0  0
  -10.7559  -11.1288   -6.0785 C   0  0  0  0  0  0  0  0  0  0  0  0
  -11.0438  -12.5821   -5.8025 C   0  0  0  0  0  0  0  0  0  0  0  0
  4  5  1  0      
  5  6  1  0      
  6  1  1  0      
  7  8  1  0      
 11 12  1  0      
 12  7  1  0      
  4 13  1  0      
  8 13  1  0      
 11 14  1  0      
 18 19  1  0      
 19 20  1  0      
 20 15  1  0      
 14 15  1  0      
 18 21  1  0      
 25 26  1  0      
 26 27  1  0      
 27 22  1  0      
 21 22  1  0      
  1 28  1  0      
  2 29  1  0      
 29 30  1  0      
  6 31  1  0      
 31 32  1  0      
  7 33  1  0      
 12 34  1  0      
 17 35  1  0      
 16 36  1  0      
 27 37  1  0      
 37 38  1  0      
 25 39  1  0      
 23 40  1  0      
 39 41  1  0      
  4  3  1  0      
  1  2  1  0      
  3  2  1  0      
  8  9  1  0      
 11 10  1  0      
  9 10  1  0      
 15 16  1  0      
 16 17  1  0      
 18 17  1  0      
 22 23  1  0      
 23 24  1  0      
 25 24  1  0      
  3 42  1  0      
 42 44  1  0      
 43 44  2  0      
 44 45  1  0      
  9 46  1  0      
 46 47  2  0      
 46 48  1  0      
 20 49  1  0      
 49 50  2  0      
 49 51  1  0      
 24 52  1  0      
 52 54  1  0      
 53 54  2  0      
 54 55  1  0      
M  STY  1   1 SUP
M  SLB  1   1   1
M  SAL   1  4  42  43  44  45
M  SBL   1  1  45
M  SMT   1 NHAc
M  SBV   1 45   -7.4880    3.9778
M  STY  1   2 SUP
M  SLB  1   2   2
M  SAL   2  3  46  47  48
M  SBL   2  1  49
M  SMT   2 CO2H
M  SBV   2 49   -7.7502    3.8268
M  STY  1   3 SUP
M  SLB  1   3   3
M  SAL   3  3  49  50  51
M  SBL   3  1  52
M  SMT   3 CO2H
M  SBV   3 52   -7.7502    5.2561
M  STY  1   4 SUP
M  SLB  1   4   4
M  SAL   4  4  52  53  54  55
M  SBL   4  1  55
M  SMT   4 NHAc
M  SBV   4 55   -7.8432    4.0360
M  END
$$$$
