# Supplementary material for: Unusual Glycosaminoglycans from a Deep Sea Hydrothermal Bacterium Improve Fibrillar Collagen Structuring and Fibroblast Activities in Engineered Connective Tissues
Source: MDPI journal article supplement (doi:10.3390/md11041351), 2013-04-23
Supplement: s2 [file s2]

marinedrugs-11-01351-s001.mol
  ChemDraw03101421112D

 55 58  0  0  0  0  0  0  0  0999 V2000
   -5.6875    0.9948    0.0000 C   0  0  0  0  0  0  0  0  0  0  0  0
   -5.2750    0.2803    0.0000 C   0  0  0  0  0  0  0  0  0  0  0  0
   -4.4769    0.4894    0.0000 C   0  0  0  0  0  0  0  0  0  0  0  0
   -3.6836    0.2803    0.0000 C   0  0  0  0  0  0  0  0  0  0  0  0
   -4.0961    0.9948    0.0000 O   0  0  0  0  0  0  0  0  0  0  0  0
   -4.8942    0.7857    0.0000 C   0  0  0  0  0  0  0  0  0  0  0  0
   -2.1400    1.0129    0.0000 C   0  0  0  0  0  0  0  0  0  0  0  0
   -2.5525    0.2984    0.0000 C   0  0  0  0  0  0  0  0  0  0  0  0
   -1.7592    0.5251    0.0000 C   0  0  0  0  0  0  0  0  0  0  0  0
   -0.9612    0.2984    0.0000 O   0  0  0  0  0  0  0  0  0  0  0  0
   -0.5486    1.0129    0.0000 C   0  0  0  0  0  0  0  0  0  0  0  0
   -1.3419    0.7863    0.0000 C   0  0  0  0  0  0  0  0  0  0  0  0
   -3.1294    0.4985    0.0000 O   0  0  0  0  0  0  0  0  0  0  0  0
    0.1659    0.6004    0.0000 O   0  0  0  0  0  0  0  0  0  0  0  0
    0.9125    0.9948    0.0000 C   0  0  0  0  0  0  0  0  0  0  0  0
    1.3250    0.2803    0.0000 C   0  0  0  0  0  0  0  0  0  0  0  0
    2.1231    0.4894    0.0000 C   0  0  0  0  0  0  0  0  0  0  0  0
    2.9164    0.2803    0.0000 C   0  0  0  0  0  0  0  0  0  0  0  0
    2.5039    0.9948    0.0000 O   0  0  0  0  0  0  0  0  0  0  0  0
    1.7058    0.7857    0.0000 C   0  0  0  0  0  0  0  0  0  0  0  0
    3.6308    0.6928    0.0000 O   0  0  0  0  0  0  0  0  0  0  0  0
    3.6350   -0.2634    0.0000 C   0  0  0  0  0  0  0  0  0  0  0  0
    4.0475   -0.9778    0.0000 C   0  0  0  0  0  0  0  0  0  0  0  0
    4.8456   -0.7687    0.0000 C   0  0  0  0  0  0  0  0  0  0  0  0
    5.6389   -0.9778    0.0000 C   0  0  0  0  0  0  0  0  0  0  0  0
    5.2264   -0.2634    0.0000 O   0  0  0  0  0  0  0  0  0  0  0  0
    4.4283   -0.4724    0.0000 C   0  0  0  0  0  0  0  0  0  0  0  0
   -6.2708    0.4114    0.0000 O   0  0  0  0  0  0  0  0  0  0  0  0
   -5.9344    0.1891    0.0000 O   0  0  0  0  0  0  0  0  0  0  0  0
   -6.3533   -0.3650    0.0000 C   0  0  0  0  0  0  0  0  0  0  0  0
   -5.3067    1.5002    0.0000 C   0  0  0  0  0  0  0  0  0  0  0  0
   -4.5923    1.9127    0.0000 O   0  0  0  0  0  0  0  0  0  0  0  0
   -2.9369    0.7994    0.0000 O   0  0  0  0  0  0  0  0  0  0  0  0
   -0.7585    1.3696    0.0000 O   0  0  0  0  0  0  0  0  0  0  0  0
    2.5356   -0.2251    0.0000 O   0  0  0  0  0  0  0  0  0  0  0  0
    0.5000    0.2803    0.0000 O   0  0  0  0  0  0  0  0  0  0  0  0
    4.0158    0.2421    0.0000 C   0  0  0  0  0  0  0  0  0  0  0  0
    4.7302    0.6546    0.0000 O   0  0  0  0  0  0  0  0  0  0  0  0
    5.6389   -1.8028    0.0000 O   0  0  0  0  0  0  0  0  0  0  0  0
    3.2506   -0.7643    0.0000 O   0  0  0  0  0  0  0  0  0  0  0  0
    6.3533   -2.2153    0.0000 C   0  0  0  0  0  0  0  0  0  0  0  0
   -4.6279   -0.0738    0.0000 N   0  0  0  0  0  0  0  0  0  0  0  0
   -5.3424    1.1637    0.0000 O   0  0  0  0  0  0  0  0  0  0  0  0
   -5.3424    0.3387    0.0000 C   0  0  0  0  0  0  0  0  0  0  0  0
   -6.0569   -0.0738    0.0000 C   0  0  0  0  0  0  0  0  0  0  0  0
   -2.1724   -0.1890    0.0000 C   0  0  0  0  0  0  0  0  0  0  0  0
   -1.7599   -0.9035    0.0000 O   0  0  0  0  0  0  0  0  0  0  0  0
   -2.9974   -0.1890    0.0000 O   0  0  0  0  0  0  0  0  0  0  0  0
    1.2926    1.5009    0.0000 C   0  0  0  0  0  0  0  0  0  0  0  0
    0.4676    1.5009    0.0000 O   0  0  0  0  0  0  0  0  0  0  0  0
    1.7051    2.2153    0.0000 O   0  0  0  0  0  0  0  0  0  0  0  0
    4.3394   -1.2737    0.0000 N   0  0  0  0  0  0  0  0  0  0  0  0
    2.9591   -0.9039    0.0000 O   0  0  0  0  0  0  0  0  0  0  0  0
    3.7560   -0.6903    0.0000 C   0  0  0  0  0  0  0  0  0  0  0  0
    3.9695    0.1066    0.0000 C   0  0  0  0  0  0  0  0  0  0  0  0
  4  5  1  0      
  5  6  1  0      
  6  1  1  0      
  7  8  1  0      
 11 12  1  0      
 12  7  1  0      
  4 13  1  0      
  8 13  1  0      
 11 14  1  0      
 18 19  1  0      
 19 20  1  0      
 20 15  1  0      
 14 15  1  0      
 18 21  1  0      
 25 26  1  0      
 26 27  1  0      
 27 22  1  0      
 21 22  1  0      
  1 28  1  0      
  2 29  1  0      
 29 30  1  0      
  6 31  1  0      
 31 32  1  0      
  7 33  1  0      
 12 34  1  0      
 17 35  1  0      
 16 36  1  0      
 27 37  1  0      
 37 38  1  0      
 25 39  1  0      
 23 40  1  0      
 39 41  1  0      
  4  3  1  1      
  1  2  1  1      
  3  2  1  1      
  8  9  1  1      
 11 10  1  1      
  9 10  1  1      
 15 16  1  1      
 16 17  1  1      
 18 17  1  1      
 22 23  1  1      
 23 24  1  1      
 25 24  1  1      
  3 42  1  0      
 42 44  1  0      
 43 44  2  0      
 44 45  1  0      
  9 46  1  0      
 46 47  2  0      
 46 48  1  0      
 20 49  1  0      
 49 50  2  0      
 49 51  1  0      
 24 52  1  0      
 52 54  1  0      
 53 54  2  0      
 54 55  1  0      
M  STY  1   1 SUP
M  SLB  1   1   1
M  SAL   1  4  42  43  44  45
M  SBL   1  1  45
M  SMT   1 NHAc
M  SBV   1 45   -7.4880    3.9778
M  STY  1   2 SUP
M  SLB  1   2   2
M  SAL   2  3  46  47  48
M  SBL   2  1  49
M  SMT   2 CO2H
M  SBV   2 49   -7.7502    3.8268
M  STY  1   3 SUP
M  SLB  1   3   3
M  SAL   3  3  49  50  51
M  SBL   3  1  52
M  SMT   3 CO2H
M  SBV   3 52   -7.7502    5.2561
M  STY  1   4 SUP
M  SLB  1   4   4
M  SAL   4  4  52  53  54  55
M  SBL   4  1  55
M  SMT   4 NHAc
M  SBV   4 55   -7.8432    4.0360
M  END
